# Supplementary material for: Regulation, genomics, and clinical characteristics of cuproptosis regulators in pan-cancer
Source: Front Oncol. 2022 Oct 27;12:934076. doi: 10.3389/fonc.2022.934076 (PMC9647015; doi:10.3389/fonc.2022.934076)
Supplement: Supplementary Table 3 — The proportion of CNVs per cuproptosis-related genes in each cancer. [file Table_3.xlsx]

## Sheet: SheetName
Table-S3 The proportion of CNVs per cuproptosis-related genes in each cancer.
cancertype	symbol	Amp_total	Del_total	Hete Amp	Hete Del	Homo Amp	Homo Del	entrez
ACC	ATP7A	47.7778	17.7778	47.7778	17.7778	0	0	538
ACC	ATP7B	6.66667	46.6667	6.66667	45.5556	0	1.11111	540
ACC	DLAT	5.55556	31.1111	5.55556	31.1111	0	0	1737
ACC	DLD	53.3333	10	53.3333	8.88889	0	1.11111	1738
ACC	FDX1	5.55556	31.1111	5.55556	31.1111	0	0	2230
ACC	GLS	15.5556	16.6667	15.5556	16.6667	0	0	2744
ACC	LIAS	42.2222	6.66667	41.1111	6.66667	1.11111	0	11019
ACC	LIPT1	15.5556	16.6667	15.5556	16.6667	0	0	51601
ACC	MTF1	3.33333	35.5556	3.33333	35.5556	0	0	4520
ACC	NLRP3	18.8889	17.7778	18.8889	17.7778	0	0	114548
ACC	PDHA1	48.8889	15.5556	47.7778	15.5556	1.11111	0	5160
ACC	PDHB	16.6667	23.3333	16.6667	23.3333	0	0	5162
ACC	SLC31A1	36.6667	5.55556	33.3333	5.55556	3.33333	0	1317
BLCA	ATP7A	13.4804	20.098	13.2353	19.3627	0.245098	0.735294	538
BLCA	ATP7B	18.8725	32.598	18.3824	27.9412	0.490196	4.65686	540
BLCA	DLAT	10.5392	37.5	10.2941	36.7647	0.245098	0.735294	1737
BLCA	DLD	35.7843	9.31373	34.8039	9.31373	0.980392	0	1738
BLCA	FDX1	11.2745	37.0098	10.7843	36.0294	0.490196	0.980392	2230
BLCA	GLS	12.5	29.4118	11.2745	28.6765	1.22549	0.735294	2744
BLCA	LIAS	12.0098	35.049	11.5196	34.8039	0.490196	0.245098	11019
BLCA	LIPT1	23.2843	15.4412	21.3235	15.4412	1.96078	0	51601
BLCA	MTF1	19.3627	15.9314	16.9118	15.9314	2.45098	0	4520
BLCA	NLRP3	34.3137	12.5	32.8431	12.5	1.47059	0	114548
BLCA	PDHA1	18.8725	19.1176	17.8922	18.6275	0.980392	0.490196	5160
BLCA	PDHB	24.7549	26.9608	24.0196	25.4902	0.735294	1.47059	5162
BLCA	SLC31A1	13.9706	41.6667	13.7255	40.9314	0.245098	0.735294	1317
BRCA	ATP7A	13.7963	18.8889	13.4259	18.7037	0.37037	0.185185	538
BRCA	ATP7B	7.77778	44.9074	7.59259	43.1481	0.185185	1.75926	540
BRCA	DLAT	8.7037	50.2778	8.42593	48.7963	0.277778	1.48148	1737
BRCA	DLD	26.0185	14.2593	25.2778	14.1667	0.740741	0.0925926	1738
BRCA	FDX1	8.88889	49.2593	8.61111	47.7778	0.277778	1.48148	2230
BRCA	GLS	10.6481	20.7407	9.35185	20.7407	1.2963	0	2744
BRCA	LIAS	9.16667	30.6481	8.88889	30.0926	0.277778	0.555556	11019
BRCA	LIPT1	11.7593	17.963	11.3889	17.963	0.37037	0	51601
BRCA	MTF1	13.6111	28.8889	12.3148	28.8889	1.2963	0	4520
BRCA	NLRP3	72.8704	3.61111	59.0741	3.61111	13.7963	0	114548
BRCA	PDHA1	17.4074	17.5	16.1111	17.2222	1.2963	0.277778	5160
BRCA	PDHB	8.7037	30.6481	8.7037	30	0	0.648148	5162
BRCA	SLC31A1	13.3333	27.4074	12.5	27.3148	0.833333	0.0925926	1317
CESC	ATP7A	10.8475	22.0339	10.1695	21.6949	0.677966	0.338983	538
CESC	ATP7B	7.79661	37.9661	7.45763	34.9153	0.338983	3.05085	540
CESC	DLAT	2.37288	53.5593	2.37288	49.1525	0	4.40678	1737
CESC	DLD	14.5763	14.2373	14.2373	13.5593	0.338983	0.677966	1738
CESC	FDX1	2.37288	53.2203	2.37288	48.8136	0	4.40678	2230
CESC	GLS	16.2712	14.2373	14.9153	14.2373	1.35593	0	2744
CESC	LIAS	3.72881	42.7119	3.38983	42.3729	0.338983	0.338983	11019
CESC	LIPT1	12.2034	11.1864	11.8644	11.1864	0.338983	0	51601
CESC	MTF1	28.8136	6.10169	28.1356	6.10169	0.677966	0	4520
CESC	NLRP3	50.8475	3.72881	48.8136	3.72881	2.0339	0	114548
CESC	PDHA1	17.2881	21.3559	15.2542	21.3559	2.0339	0	5160
CESC	PDHB	9.15254	43.0508	9.15254	40.678	0	2.37288	5162
CESC	SLC31A1	16.6102	17.9661	16.6102	17.9661	0	0	1317
CHOL	ATP7A	2.77778	44.4444	2.77778	44.4444	0	0	538
CHOL	ATP7B	8.33333	44.4444	8.33333	44.4444	0	0	540
CHOL	DLAT	8.33333	33.3333	8.33333	33.3333	0	0	1737
CHOL	DLD	13.8889	13.8889	13.8889	13.8889	0	0	1738
CHOL	FDX1	8.33333	33.3333	8.33333	33.3333	0	0	2230
CHOL	GLS	16.6667	5.55556	16.6667	5.55556	0	0	2744
CHOL	LIAS	13.8889	25	11.1111	25	2.77778	0	11019
CHOL	LIPT1	13.8889	2.77778	13.8889	2.77778	0	0	51601
CHOL	MTF1	19.4444	30.5556	19.4444	30.5556	0	0	4520
CHOL	NLRP3	61.1111	2.77778	50	2.77778	11.1111	0	114548
CHOL	PDHA1	2.77778	44.4444	2.77778	44.4444	0	0	5160
CHOL	PDHB	2.77778	77.7778	2.77778	77.7778	0	0	5162
CHOL	SLC31A1	2.77778	50	2.77778	50	0	0	1317
COAD	ATP7A	16.408	13.082	16.408	12.8603	0	0.22173	538
COAD	ATP7B	58.7583	3.10421	55.6541	2.88248	3.10421	0.22173	540
COAD	DLAT	12.1951	15.7428	11.9734	15.5211	0.22173	0.22173	1737
COAD	DLD	49.0022	1.33038	48.7805	1.10865	0.22173	0.22173	1738
COAD	FDX1	12.4169	15.9645	12.1951	15.5211	0.22173	0.443459	2230
COAD	GLS	19.0687	2.66075	19.0687	2.66075	0	0	2744
COAD	LIAS	3.10421	30.3769	3.10421	30.3769	0	0	11019
COAD	LIPT1	17.7384	1.55211	17.7384	1.55211	0	0	51601
COAD	MTF1	4.65632	25.4989	4.43459	25.4989	0.22173	0	4520
COAD	NLRP3	21.7295	11.0865	21.286	10.8647	0.443459	0.22173	114548
COAD	PDHA1	17.2949	15.2993	16.8514	14.4124	0.443459	0.886918	5160
COAD	PDHB	8.86918	15.2993	8.86918	15.0776	0	0.22173	5162
COAD	SLC31A1	14.4124	12.8603	14.4124	12.8603	0	0	1317
DLBC	ATP7A	8.33333	12.5	8.33333	12.5	0	0	538
DLBC	ATP7B	12.5	10.4167	12.5	8.33333	0	2.08333	540
DLBC	DLAT	33.3333	4.16667	33.3333	2.08333	0	2.08333	1737
DLBC	DLD	29.1667	4.16667	27.0833	4.16667	2.08333	0	1738
DLBC	FDX1	33.3333	4.16667	33.3333	2.08333	0	2.08333	2230
DLBC	GLS	10.4167	6.25	10.4167	6.25	0	0	2744
DLBC	LIAS	0	6.25	0	6.25	0	0	11019
DLBC	LIPT1	6.25	8.33333	6.25	6.25	0	2.08333	51601
DLBC	MTF1	0	12.5	0	12.5	0	0	4520
DLBC	NLRP3	10.4167	18.75	10.4167	10.4167	0	8.33333	114548
DLBC	PDHA1	8.33333	16.6667	8.33333	14.5833	0	2.08333	5160
DLBC	PDHB	20.8333	8.33333	20.8333	8.33333	0	0	5162
DLBC	SLC31A1	16.6667	2.08333	16.6667	2.08333	0	0	1317
ESCA	ATP7A	24.4565	20.1087	23.913	19.0217	0.543478	1.08696	538
ESCA	ATP7B	27.1739	35.3261	25	34.7826	2.17391	0.543478	540
ESCA	DLAT	15.2174	40.7609	14.1304	39.1304	1.08696	1.63043	1737
ESCA	DLD	50.5435	17.9348	42.3913	17.9348	8.15217	0	1738
ESCA	FDX1	14.1304	40.2174	13.0435	39.1304	1.08696	1.08696	2230
ESCA	GLS	30.9783	11.9565	29.8913	11.9565	1.08696	0	2744
ESCA	LIAS	11.9565	54.8913	10.8696	54.8913	1.08696	0	11019
ESCA	LIPT1	35.8696	5.43478	33.1522	5.43478	2.71739	0	51601
ESCA	MTF1	19.5652	28.8043	17.3913	28.2609	2.17391	0.543478	4520
ESCA	NLRP3	48.913	7.06522	46.7391	7.06522	2.17391	0	114548
ESCA	PDHA1	14.6739	35.3261	13.0435	32.6087	1.63043	2.71739	5160
ESCA	PDHB	5.97826	69.0217	5.43478	67.3913	0.543478	1.63043	5162
ESCA	SLC31A1	27.1739	29.3478	26.6304	29.3478	0.543478	0	1317
GBM	ATP7A	5.026	18.0243	4.85269	17.851	0.17331	0.17331	538
GBM	ATP7B	1.03986	43.1542	0.866551	41.9411	0.17331	1.21317	540
GBM	DLAT	3.29289	15.5979	2.77296	15.5979	0.519931	0	1737
GBM	DLD	81.4558	1.03986	80.7626	1.03986	0.693241	0	1738
GBM	FDX1	3.63951	15.9445	2.94627	15.9445	0.693241	0	2230
GBM	GLS	5.71924	6.58579	5.71924	6.41248	0	0.17331	2744
GBM	LIAS	6.41248	10.9185	6.06586	10.7452	0.34662	0.17331	11019
GBM	LIPT1	5.71924	6.06586	5.54593	6.06586	0.17331	0	51601
GBM	MTF1	14.9047	4.50607	14.5581	4.50607	0.34662	0	4520
GBM	NLRP3	15.9445	5.37262	15.5979	4.67938	0.34662	0.693241	114548
GBM	PDHA1	4.85269	19.9307	4.67938	19.4107	0.17331	0.519931	5160
GBM	PDHB	9.70537	8.83882	9.70537	8.83882	0	0	5162
GBM	SLC31A1	14.9047	11.2652	14.3847	11.0919	0.519931	0.17331	1317
HNSC	ATP7A	20.1149	14.751	19.9234	14.3678	0.191571	0.383142	538
HNSC	ATP7B	11.3027	39.4636	11.1111	38.5057	0.191571	0.957854	540
HNSC	DLAT	10.728	47.1264	10.728	45.4023	0	1.72414	1737
HNSC	DLD	28.7356	9.57854	26.0536	9.57854	2.68199	0	1738
HNSC	FDX1	10.9195	46.7433	10.728	45.0192	0.191571	1.72414	2230
HNSC	GLS	18.1992	12.8352	15.3257	12.4521	2.87356	0.383142	2744
HNSC	LIAS	8.62069	36.7816	8.62069	36.59	0	0.191571	11019
HNSC	LIPT1	18.5824	6.32184	18.0077	6.13027	0.574713	0.191571	51601
HNSC	MTF1	13.9847	13.0268	13.2184	13.0268	0.766284	0	4520
HNSC	NLRP3	28.1609	8.23755	27.0115	8.04598	1.14943	0.191571	114548
HNSC	PDHA1	9.00383	28.9272	8.81226	27.2031	0.191571	1.72414	5160
HNSC	PDHB	1.91571	71.8391	1.91571	70.8812	0	0.957854	5162
HNSC	SLC31A1	33.3333	10.9195	31.8008	10.9195	1.53257	0	1317
KICH	ATP7A	10.6061	62.1212	10.6061	60.6061	0	1.51515	538
KICH	ATP7B	3.0303	66.6667	3.0303	66.6667	0	0	540
KICH	DLAT	25.7576	13.6364	24.2424	13.6364	1.51515	0	1737
KICH	DLD	37.8788	1.51515	36.3636	1.51515	1.51515	0	1738
KICH	FDX1	25.7576	13.6364	24.2424	13.6364	1.51515	0	2230
KICH	GLS	1.51515	71.2121	1.51515	71.2121	0	0	2744
KICH	LIAS	34.8485	1.51515	34.8485	1.51515	0	0	11019
KICH	LIPT1	3.0303	69.697	3.0303	69.697	0	0	51601
KICH	MTF1	1.51515	80.303	1.51515	80.303	0	0	4520
KICH	NLRP3	1.51515	77.2727	1.51515	77.2727	0	0	114548
KICH	PDHA1	12.1212	59.0909	12.1212	59.0909	0	0	5160
KICH	PDHB	9.09091	16.6667	9.09091	16.6667	0	0	5162
KICH	SLC31A1	12.1212	15.1515	12.1212	15.1515	0	0	1317
KIRC	ATP7A	4.16667	9.84848	4.16667	9.2803	0	0.568182	538
KIRC	ATP7B	3.97727	15.3409	3.97727	15.1515	0	0.189394	540
KIRC	DLAT	5.49242	5.68182	5.30303	5.49242	0.189394	0.189394	1737
KIRC	DLD	32.9545	0.378788	32.3864	0.378788	0.568182	0	1738
KIRC	FDX1	5.49242	5.68182	5.30303	5.49242	0.189394	0.189394	2230
KIRC	GLS	15.1515	4.35606	14.0152	4.16667	1.13636	0.189394	2744
KIRC	LIAS	2.84091	13.6364	2.46212	13.447	0.378788	0.189394	11019
KIRC	LIPT1	14.2045	2.65152	14.2045	2.65152	0	0	51601
KIRC	MTF1	3.0303	15.5303	2.84091	15.5303	0.189394	0	4520
KIRC	NLRP3	10.9848	7.95455	10.7955	7.95455	0.189394	0	114548
KIRC	PDHA1	5.49242	9.84848	5.49242	9.4697	0	0.378788	5160
KIRC	PDHB	1.51515	81.8182	1.51515	75.1894	0	6.62879	5162
KIRC	SLC31A1	2.27273	28.4091	2.27273	28.4091	0	0	1317
KIRP	ATP7A	34.375	10.7639	34.375	10.7639	0	0	538
KIRP	ATP7B	10.0694	8.33333	9.72222	8.33333	0.347222	0	540
KIRP	DLAT	3.125	10.7639	3.125	9.02778	0	1.73611	1737
KIRP	DLD	60.4167	1.04167	59.0278	0.694444	1.38889	0.347222	1738
KIRP	FDX1	3.125	11.1111	3.125	9.375	0	1.73611	2230
KIRP	GLS	18.0556	1.04167	16.6667	1.04167	1.38889	0	2744
KIRP	LIAS	3.125	8.33333	3.125	8.33333	0	0	11019
KIRP	LIPT1	16.3194	1.38889	16.3194	1.38889	0	0	51601
KIRP	MTF1	1.04167	14.2361	1.04167	13.8889	0	0.347222	4520
KIRP	NLRP3	6.59722	7.29167	6.59722	6.94444	0	0.347222	114548
KIRP	PDHA1	31.25	11.8056	31.25	11.1111	0	0.694444	5160
KIRP	PDHB	25	9.02778	25	8.68056	0	0.347222	5162
KIRP	SLC31A1	0.694444	11.4583	0.347222	11.1111	0.347222	0.347222	1317
LAML	ATP7A	1.04712	3.14136	1.04712	3.14136	0	0	538
LAML	ATP7B	3.14136	0.52356	3.14136	0.52356	0	0	540
LAML	DLAT	4.71204	0	3.66492	0	1.04712	0	1737
LAML	DLD	0	10.9948	0	10.4712	0	0.52356	1738
LAML	FDX1	4.71204	0	3.66492	0	1.04712	0	2230
LAML	GLS	0.52356	0	0.52356	0	0	0	2744
LAML	LIAS	1.57068	1.57068	1.57068	1.57068	0	0	11019
LAML	LIPT1	0.52356	0	0.52356	0	0	0	51601
LAML	MTF1	2.6178	0	2.6178	0	0	0	4520
LAML	NLRP3	2.09424	0	1.04712	0	1.04712	0	114548
LAML	PDHA1	1.57068	2.6178	1.57068	2.6178	0	0	5160
LAML	PDHB	0.52356	3.14136	0.52356	3.14136	0	0	5162
LAML	SLC31A1	0.52356	1.04712	0.52356	1.04712	0	0	1317
LGG	ATP7A	10.1365	14.8148	8.577	13.4503	1.55945	1.36452	538
LGG	ATP7B	0.194932	28.0702	0.194932	25.9259	0	2.14425	540
LGG	DLAT	13.2554	4.09357	12.8655	4.09357	0.389864	0	1737
LGG	DLD	33.3333	0.389864	29.8246	0.389864	3.50877	0	1738
LGG	FDX1	13.2554	4.09357	12.8655	4.09357	0.389864	0	2230
LGG	GLS	2.14425	4.87329	2.14425	4.67836	0	0.194932	2744
LGG	LIAS	2.53411	13.2554	2.33918	13.2554	0.194932	0	11019
LGG	LIPT1	2.33918	3.50877	2.33918	3.50877	0	0	51601
LGG	MTF1	2.53411	36.2573	2.53411	36.0624	0	0.194932	4520
LGG	NLRP3	5.65302	7.01754	5.65302	6.23782	0	0.779727	114548
LGG	PDHA1	5.06823	20.6628	4.67836	19.2982	0.389864	1.36452	5160
LGG	PDHB	1.94932	8.77193	1.75439	7.9922	0.194932	0.779727	5162
LGG	SLC31A1	5.65302	9.55166	5.26316	9.55166	0.389864	0	1317
LIHC	ATP7A	17.027	20	16.7568	20	0.27027	0	538
LIHC	ATP7B	3.51351	47.027	3.24324	44.8649	0.27027	2.16216	540
LIHC	DLAT	5.67568	25.1351	5.67568	24.8649	0	0.27027	1737
LIHC	DLD	31.8919	7.56757	29.7297	7.56757	2.16216	0	1738
LIHC	FDX1	6.75676	24.5946	6.75676	24.3243	0	0.27027	2230
LIHC	GLS	14.5946	10	13.7838	10	0.810811	0	2744
LIHC	LIAS	14.3243	20.5405	12.1622	20.5405	2.16216	0	11019
LIHC	LIPT1	11.6216	11.0811	11.3514	11.0811	0.27027	0	51601
LIHC	MTF1	8.37838	30.2703	8.10811	30	0.27027	0.27027	4520
LIHC	NLRP3	71.3514	1.89189	62.1622	1.89189	9.18919	0	114548
LIHC	PDHA1	9.45946	29.4595	9.18919	28.6486	0.27027	0.810811	5160
LIHC	PDHB	10	18.1081	9.18919	17.8378	0.810811	0.27027	5162
LIHC	SLC31A1	6.75676	31.3514	6.21622	31.3514	0.54054	0	1317
LUAD	ATP7A	13.5659	15.8915	13.1783	15.8915	0.387597	0	538
LUAD	ATP7B	9.49612	52.5194	8.91473	51.1628	0.581395	1.35659	540
LUAD	DLAT	23.062	23.4496	21.8992	22.2868	1.16279	1.16279	1737
LUAD	DLD	42.6357	11.8217	40.3101	11.2403	2.32558	0.581395	1738
LUAD	FDX1	23.062	23.6434	22.093	22.4806	0.968992	1.16279	2230
LUAD	GLS	28.2946	6.58915	27.1318	6.58915	1.16279	0	2744
LUAD	LIAS	19.3798	22.093	18.0233	22.093	1.35659	0	11019
LUAD	LIPT1	31.0078	4.84496	30.2326	4.84496	0.775194	0	51601
LUAD	MTF1	25.5814	19.5736	24.6124	19.5736	0.968992	0	4520
LUAD	NLRP3	67.6357	4.84496	60.2713	4.65116	7.36434	0.193798	114548
LUAD	PDHA1	10.2713	25.969	9.68992	25	0.581395	0.968992	5160
LUAD	PDHB	6.39535	45.7364	6.20155	45.5426	0.193798	0.193798	5162
LUAD	SLC31A1	9.88372	43.4109	9.49612	43.0233	0.387597	0.387597	1317
LUSC	ATP7A	15.5689	24.9501	15.1697	23.9521	0.399202	0.998004	538
LUSC	ATP7B	9.18164	66.4671	8.98204	64.8703	0.199601	1.59681	540
LUSC	DLAT	19.7605	35.1297	19.5609	33.9321	0.199601	1.1976	1737
LUSC	DLD	46.9062	11.3772	44.3114	11.1776	2.59481	0.199601	1738
LUSC	FDX1	20.7585	33.9321	20.1597	33.3333	0.598802	0.598802	2230
LUSC	GLS	30.3393	12.1756	28.1437	11.7764	2.19561	0.399202	2744
LUSC	LIAS	7.38523	61.2774	6.98603	61.0778	0.399202	0.199601	11019
LUSC	LIPT1	41.3174	4.59082	39.1218	4.59082	2.19561	0	51601
LUSC	MTF1	14.1717	36.1277	13.3733	36.1277	0.798403	0	4520
LUSC	NLRP3	51.2974	7.78443	48.9022	7.78443	2.39521	0	114548
LUSC	PDHA1	15.1697	29.1417	13.9721	27.9441	1.1976	1.1976	5160
LUSC	PDHB	1.1976	86.0279	1.1976	84.8303	0	1.1976	5162
LUSC	SLC31A1	19.9601	46.7066	19.7605	46.507	0.199601	0.199601	1317
MESO	ATP7A	6.89655	31.0345	6.89655	31.0345	0	0	538
MESO	ATP7B	3.44828	45.977	3.44828	45.977	0	0	540
MESO	DLAT	14.9425	17.2414	14.9425	17.2414	0	0	1737
MESO	DLD	26.4368	3.44828	26.4368	3.44828	0	0	1738
MESO	FDX1	13.7931	16.092	13.7931	16.092	0	0	2230
MESO	GLS	5.74713	9.1954	5.74713	9.1954	0	0	2744
MESO	LIAS	1.14943	41.3793	1.14943	41.3793	0	0	11019
MESO	LIPT1	4.5977	8.04598	4.5977	8.04598	0	0	51601
MESO	MTF1	10.3448	14.9425	8.04598	14.9425	2.29885	0	4520
MESO	NLRP3	26.4368	3.44828	25.2874	3.44828	1.14943	0	114548
MESO	PDHA1	5.74713	31.0345	5.74713	31.0345	0	0	5160
MESO	PDHB	12.6437	36.7816	12.6437	35.6322	0	1.14943	5162
MESO	SLC31A1	6.89655	19.5402	6.89655	19.5402	0	0	1317
OV	ATP7A	25.0432	42.8325	23.6615	42.1416	1.38169	0.690846	538
OV	ATP7B	13.4715	61.658	12.6079	59.5855	0.863558	2.07254	540
OV	DLAT	26.943	31.0881	23.4888	30.0518	3.45423	1.03627	1737
OV	DLD	45.4231	13.2988	39.7237	13.1261	5.69948	0.172712	1738
OV	FDX1	27.6339	30.7427	24.0069	29.5337	3.62694	1.20898	2230
OV	GLS	42.3143	11.399	36.7876	11.399	5.52677	0	2744
OV	LIAS	12.9534	48.8774	11.9171	48.1865	1.03627	0.690846	11019
OV	LIPT1	31.6062	11.2263	30.2245	11.0535	1.38169	0.172712	51601
OV	MTF1	46.114	14.5078	36.0967	14.3351	10.0173	0.172712	4520
OV	NLRP3	53.5406	11.2263	43.696	11.0535	9.84456	0.172712	114548
OV	PDHA1	15.1986	59.5855	13.9896	58.3765	1.20898	1.20898	5160
OV	PDHB	21.2435	28.4974	18.9983	28.152	2.24525	0.345423	5162
OV	SLC31A1	12.6079	51.8135	11.7444	51.6408	0.863558	0.172712	1317
PAAD	ATP7A	7.06522	12.5	7.06522	12.5	0	0	538
PAAD	ATP7B	16.3043	10.3261	16.3043	10.3261	0	0	540
PAAD	DLAT	10.3261	9.23913	9.78261	9.23913	0.543478	0	1737
PAAD	DLD	24.4565	6.52174	22.2826	6.52174	2.17391	0	1738
PAAD	FDX1	10.3261	9.23913	10.3261	9.23913	0	0	2230
PAAD	GLS	12.5	3.26087	11.9565	3.26087	0.543478	0	2744
PAAD	LIAS	8.15217	11.9565	7.06522	11.9565	1.08696	0	11019
PAAD	LIPT1	8.69565	4.34783	8.69565	4.34783	0	0	51601
PAAD	MTF1	6.52174	23.913	5.43478	23.913	1.08696	0	4520
PAAD	NLRP3	31.5217	4.8913	28.8043	4.34783	2.71739	0.543478	114548
PAAD	PDHA1	4.8913	14.1304	4.34783	13.587	0.543478	0.543478	5160
PAAD	PDHB	3.26087	25.5435	3.26087	25.5435	0	0	5162
PAAD	SLC31A1	4.8913	25	4.8913	25	0	0	1317
PCPG	ATP7A	3.08642	30.2469	3.08642	30.2469	0	0	538
PCPG	ATP7B	6.17284	4.32099	5.55556	4.32099	0.617284	0	540
PCPG	DLAT	1.23457	27.7778	1.23457	27.7778	0	0	1737
PCPG	DLD	12.3457	5.55556	12.3457	5.55556	0	0	1738
PCPG	FDX1	1.23457	27.7778	1.23457	27.7778	0	0	2230
PCPG	GLS	1.23457	8.64198	1.23457	8.64198	0	0	2744
PCPG	LIAS	2.46914	6.79012	2.46914	6.79012	0	0	11019
PCPG	LIPT1	1.23457	7.40741	1.23457	7.40741	0	0	51601
PCPG	MTF1	1.85185	62.3457	1.23457	60.4938	0.617284	1.85185	4520
PCPG	NLRP3	12.963	12.963	10.4938	12.963	2.46914	0	114548
PCPG	PDHA1	4.32099	27.7778	4.32099	27.7778	0	0	5160
PCPG	PDHB	1.23457	37.6543	0.617284	37.6543	0.617284	0	5162
PCPG	SLC31A1	1.85185	6.17284	1.85185	6.17284	0	0	1317
PRAD	ATP7A	2.23577	6.91057	2.03252	6.70732	0.203252	0.203252	538
PRAD	ATP7B	0.813008	43.0894	0.609756	26.8293	0.203252	16.2602	540
PRAD	DLAT	5.89431	8.13008	5.89431	6.09756	0	2.03252	1737
PRAD	DLD	20.122	2.84553	19.7154	2.23577	0.406504	0.609756	1738
PRAD	FDX1	5.89431	7.31707	5.89431	5.89431	0	1.42276	2230
PRAD	GLS	2.64228	5.0813	2.23577	5.0813	0.406504	0	2744
PRAD	LIAS	2.03252	7.31707	2.03252	5.69106	0	1.62602	11019
PRAD	LIPT1	2.43902	4.47154	2.23577	4.47154	0.203252	0	51601
PRAD	MTF1	0.609756	7.72358	0.609756	7.52033	0	0.203252	4520
PRAD	NLRP3	6.50407	4.06504	6.09756	2.84553	0.406504	1.21951	114548
PRAD	PDHA1	4.47154	5.28455	3.65854	5.0813	0.813008	0.203252	5160
PRAD	PDHB	8.13008	2.84553	7.52033	2.23577	0.609756	0.609756	5162
PRAD	SLC31A1	11.9919	2.43902	10.5691	2.43902	1.42276	0	1317
READ	ATP7A	20	16.9697	20	15.7576	0	1.21212	538
READ	ATP7B	69.0909	6.06061	67.8788	6.06061	1.21212	0	540
READ	DLAT	15.7576	23.6364	15.7576	23.6364	0	0	1737
READ	DLD	51.5152	1.81818	50.9091	1.81818	0.606061	0	1738
READ	FDX1	15.7576	23.0303	15.7576	22.4242	0	0.606061	2230
READ	GLS	27.2727	3.63636	27.2727	3.63636	0	0	2744
READ	LIAS	6.06061	37.5758	6.06061	37.5758	0	0	11019
READ	LIPT1	25.4545	3.63636	25.4545	3.63636	0	0	51601
READ	MTF1	4.24242	33.3333	4.24242	33.3333	0	0	4520
READ	NLRP3	27.2727	11.5152	26.0606	11.5152	1.21212	0	114548
READ	PDHA1	20	15.7576	18.7879	15.7576	1.21212	0	5160
READ	PDHB	15.7576	13.9394	15.7576	13.3333	0	0.606061	5162
READ	SLC31A1	22.4242	16.3636	21.8182	16.3636	0.606061	0	1317
SARC	ATP7A	16.3424	40.4669	13.6187	38.9105	2.72374	1.55642	538
SARC	ATP7B	2.72374	64.2023	2.72374	62.2568	0	1.94553	540
SARC	DLAT	7.00389	45.9144	6.61479	42.4125	0.389105	3.50195	1737
SARC	DLD	29.9611	14.0078	26.8482	14.0078	3.11284	0	1738
SARC	FDX1	7.00389	45.1362	6.61479	41.6342	0.389105	3.50195	2230
SARC	GLS	11.6732	28.4047	10.8949	27.6265	0.77821	0.77821	2744
SARC	LIAS	29.1829	12.4514	28.4047	12.4514	0.77821	0	11019
SARC	LIPT1	21.7899	17.5097	20.6226	17.1206	1.16732	0.389105	51601
SARC	MTF1	29.572	11.6732	28.4047	11.6732	1.16732	0	4520
SARC	NLRP3	17.8988	30.7393	15.9533	29.572	1.94553	1.16732	114548
SARC	PDHA1	34.2412	23.7354	29.9611	23.3463	4.28016	0.389105	5160
SARC	PDHB	16.7315	23.7354	16.7315	21.7899	0	1.94553	5162
SARC	SLC31A1	35.7977	12.8405	34.2412	12.8405	1.55642	0	1317
SKCM	ATP7A	13.8965	24.2507	12.8065	23.9782	1.08992	0.27248	538
SKCM	ATP7B	25.8856	23.4332	25.6131	23.1608	0.27248	0.27248	540
SKCM	DLAT	5.99455	55.5858	5.99455	52.3161	0	3.26975	1737
SKCM	DLD	54.7684	6.53951	51.2262	6.53951	3.54223	0	1738
SKCM	FDX1	6.81199	54.7684	6.26703	51.7711	0.544959	2.99728	2230
SKCM	GLS	19.891	14.7139	19.891	14.7139	0	0	2744
SKCM	LIAS	17.1662	18.5286	16.6213	18.5286	0.544959	0	11019
SKCM	LIPT1	17.9837	13.079	17.7112	13.079	0.27248	0	51601
SKCM	MTF1	21.7984	15.8038	21.2534	15.8038	0.544959	0	4520
SKCM	NLRP3	54.4959	5.17711	49.5913	5.17711	4.90463	0	114548
SKCM	PDHA1	15.2589	22.8883	14.4414	22.8883	0.817439	0	5160
SKCM	PDHB	19.6185	16.8937	18.2561	16.8937	1.3624	0	5162
SKCM	SLC31A1	7.35695	47.4114	7.35695	47.4114	0	0	1317
STAD	ATP7A	13.3787	13.8322	12.2449	12.6984	1.13379	1.13379	538
STAD	ATP7B	38.5488	10.8844	36.5079	9.97732	2.04082	0.90703	540
STAD	DLAT	16.3265	21.542	15.6463	20.8617	0.680272	0.680272	1737
STAD	DLD	40.3628	11.7914	38.322	11.5646	2.04082	0.226757	1738
STAD	FDX1	16.3265	21.0884	15.873	20.4082	0.453515	0.680272	2230
STAD	GLS	17.6871	9.75057	16.0998	9.07029	1.5873	0.680272	2744
STAD	LIAS	5.44218	36.7347	5.44218	36.5079	0	0.226757	11019
STAD	LIPT1	18.8209	4.98866	18.1406	4.98866	0.680272	0	51601
STAD	MTF1	11.7914	18.1406	10.4308	17.9138	1.36054	0.226757	4520
STAD	NLRP3	33.1066	4.30839	30.6122	4.08163	2.49433	0.226757	114548
STAD	PDHA1	13.8322	16.0998	12.9252	14.2857	0.90703	1.81406	5160
STAD	PDHB	6.57596	32.6531	6.34921	31.746	0.226757	0.90703	5162
STAD	SLC31A1	21.542	20.8617	20.6349	20.6349	0.90703	0.226757	1317
TGCT	ATP7A	16	18.6667	16	18	0	0.666667	538
TGCT	ATP7B	0.666667	75.3333	0	75.3333	0.666667	0	540
TGCT	DLAT	0.666667	81.3333	0.666667	75.3333	0	6	1737
TGCT	DLD	71.3333	2.66667	70.6667	2.66667	0.666667	0	1738
TGCT	FDX1	1.33333	80	1.33333	74	0	6	2230
TGCT	GLS	30	3.33333	30	3.33333	0	0	2744
TGCT	LIAS	2	62	2	62	0	0	11019
TGCT	LIPT1	30	3.33333	30	3.33333	0	0	51601
TGCT	MTF1	23.3333	16	23.3333	16	0	0	4520
TGCT	NLRP3	44.6667	4	44.6667	4	0	0	114548
TGCT	PDHA1	19.3333	18	19.3333	16.6667	0	1.33333	5160
TGCT	PDHB	20.6667	19.3333	20	19.3333	0.666667	0	5162
TGCT	SLC31A1	13.3333	38	13.3333	38	0	0	1317
THCA	ATP7A	1.60321	0.801603	1.40281	0.801603	0.200401	0	538
THCA	ATP7B	1.002	3.80762	1.002	3.00601	0	0.801603	540
THCA	DLAT	1.002	1.80361	1.002	1.80361	0	0	1737
THCA	DLD	4.00802	0.200401	4.00802	0	0	0.200401	1738
THCA	FDX1	1.002	1.80361	1.002	1.80361	0	0	2230
THCA	GLS	0.200401	2.00401	0.200401	2.00401	0	0	2744
THCA	LIAS	1.002	0.400802	1.002	0.400802	0	0	11019
THCA	LIPT1	0.601202	1.80361	0.601202	1.80361	0	0	51601
THCA	MTF1	0.400802	0.801603	0.400802	0.801603	0	0	4520
THCA	NLRP3	6.01202	0.601202	5.01002	0.601202	1.002	0	114548
THCA	PDHA1	1.80361	0.601202	1.40281	0.601202	0.400802	0	5160
THCA	PDHB	0.601202	0.601202	0.601202	0.601202	0	0	5162
THCA	SLC31A1	0.801603	5.61122	0.801603	5.01002	0	0.601202	1317
THYM	ATP7A	1.62602	4.87805	1.62602	4.87805	0	0	538
THYM	ATP7B	0.813008	11.3821	0.813008	11.3821	0	0	540
THYM	DLAT	0.813008	5.69106	0.813008	5.69106	0	0	1737
THYM	DLD	13.0081	1.62602	13.0081	1.62602	0	0	1738
THYM	FDX1	0.813008	5.69106	0.813008	5.69106	0	0	2230
THYM	GLS	0	1.62602	0	1.62602	0	0	2744
THYM	LIAS	1.62602	4.06504	1.62602	4.06504	0	0	11019
THYM	LIPT1	0	1.62602	0	1.62602	0	0	51601
THYM	MTF1	0.813008	5.69106	0.813008	5.69106	0	0	4520
THYM	NLRP3	21.9512	0.813008	21.1382	0	0.813008	0.813008	114548
THYM	PDHA1	1.62602	6.50407	1.62602	6.50407	0	0	5160
THYM	PDHB	0.813008	11.3821	0	11.3821	0.813008	0	5162
THYM	SLC31A1	8.94309	1.62602	8.94309	1.62602	0	0	1317
UCEC	ATP7A	14.6568	12.4304	14.6568	12.2449	0	0.185529	538
UCEC	ATP7B	5.93692	19.1095	5.93692	18.9239	0	0.185529	540
UCEC	DLAT	4.63822	16.5121	4.45269	15.5844	0.185529	0.927644	1737
UCEC	DLD	14.8423	9.27644	14.2857	9.09091	0.556586	0.185529	1738
UCEC	FDX1	4.63822	16.5121	4.45269	15.5844	0.185529	0.927644	2230
UCEC	GLS	17.6252	3.52505	15.9555	3.52505	1.66976	0	2744
UCEC	LIAS	4.45269	17.9963	3.71058	17.6252	0.742115	0.371057	11019
UCEC	LIPT1	17.2542	2.5974	16.5121	2.5974	0.742115	0	51601
UCEC	MTF1	10.9462	6.12245	9.09091	6.12245	1.85529	0	4520
UCEC	NLRP3	40.8163	2.04082	37.2913	2.04082	3.52505	0	114548
UCEC	PDHA1	14.2857	15.2134	14.1002	14.8423	0.185529	0.371057	5160
UCEC	PDHB	9.09091	13.5436	8.53432	12.987	0.556586	0.556586	5162
UCEC	SLC31A1	2.5974	24.3043	1.2987	23.5622	1.2987	0.742115	1317
UCS	ATP7A	26.7857	32.1429	25	32.1429	1.78571	0	538
UCS	ATP7B	25	55.3571	25	51.7857	0	3.57143	540
UCS	DLAT	19.6429	44.6429	17.8571	42.8571	1.78571	1.78571	1737
UCS	DLD	32.1429	30.3571	28.5714	30.3571	3.57143	0	1738
UCS	FDX1	19.6429	44.6429	17.8571	42.8571	1.78571	1.78571	2230
UCS	GLS	37.5	7.14286	35.7143	7.14286	1.78571	0	2744
UCS	LIAS	28.5714	42.8571	28.5714	42.8571	0	0	11019
UCS	LIPT1	46.4286	3.57143	44.6429	3.57143	1.78571	0	51601
UCS	MTF1	37.5	17.8571	35.7143	17.8571	1.78571	0	4520
UCS	NLRP3	69.6429	7.14286	66.0714	7.14286	3.57143	0	114548
UCS	PDHA1	33.9286	28.5714	33.9286	28.5714	0	0	5160
UCS	PDHB	16.0714	67.8571	16.0714	64.2857	0	3.57143	5162
UCS	SLC31A1	3.57143	75	3.57143	75	0	0	1317
UVM	ATP7A	12.5	16.25	12.5	16.25	0	0	538
UVM	ATP7B	7.5	3.75	7.5	3.75	0	0	540
UVM	DLAT	12.5	3.75	12.5	2.5	0	1.25	1737
UVM	DLD	8.75	0	8.75	0	0	0	1738
UVM	FDX1	12.5	3.75	12.5	2.5	0	1.25	2230
UVM	GLS	10	0	10	0	0	0	2744
UVM	LIAS	12.5	1.25	12.5	1.25	0	0	11019
UVM	LIPT1	10	0	10	0	0	0	51601
UVM	MTF1	0	30	0	30	0	0	4520
UVM	NLRP3	15	1.25	13.75	0	1.25	1.25	114548
UVM	PDHA1	12.5	15	12.5	15	0	0	5160
UVM	PDHB	0	53.75	0	53.75	0	0	5162
UVM	SLC31A1	5	7.5	5	7.5	0	0	1317
